# Supplementary material
Source: PubMed Central journal article supplement (PMC10202423)
Supplement: ciac793_supplementary_data.pdf [file ciac793_supplementary_data.pdf]

## Supplementary Material

**Supplementary Table 1: Demographic data and delivery outcomes by SARS-CoV-2 infection severity**

| Maternal                                           | Asymptomatic<br>N = 64 | Mild<br>N = 140   | Moderate<br>N = 32 | Severe/Critical<br>N = 12 | p-value |
|----------------------------------------------------|------------------------|-------------------|--------------------|---------------------------|---------|
| Maternal Age mean (std)                            | 29.6 (6.2)             | 32.1 (5.6)        | 33.3 (5.9)         | 33.5 (5.7)                | 0.43    |
| Race                                               |                        |                   |                    |                           | 0.096   |
| White                                              | 23 (35.9)              | 59 (42.1)         | 18 (56.3)          | 5 (41.7)                  |         |
| Black                                              | 16 (25.0)              | 11 (7.9)          | 1 (3.1)            | 1 (8.3)                   |         |
| Asian                                              | 2 (3.1)                | 6 (4.3)           | 0                  | 0                         |         |
| Other                                              | 21 (32.8)              | 53 (37.9)         | 12 (37.5)          | 6 (50.0)                  |         |
| Unknown                                            | 2 (3.1)                | 11 (7.9)          | 1 (3.1)            | 0                         |         |
| Latinx                                             | 27 (42.2)              | 61 (45.2)         | 20 (62.5)          | 7 (58.3)                  | 0.22    |
| Public insurance                                   | 38 (59.4)              | 52 (37.4)         | 14 (43.8)          | 5 (41.7)                  | 0.030   |
| Multiple Gestations                                | 1 (1.6)                | 2 (1.4)           | 0                  | 1 (8.3)                   | 0.31    |
| Preterm Birth                                      | 11 (17.2)              | 13 (9.3)          | 5 (15.6)           | 3 (25.0)                  | 0.16    |
| Nulliparous                                        | 27 (42.2)              | 59 (42.1)         | 12 (37.5)          | 5 (41.7)                  | 0.98    |
| Comorbidities                                      |                        |                   |                    |                           |         |
| Asthma                                             | 11 (17.2)              | 15 (10.7)         | 6 (18.8)           | 3 (25.0)                  | 0.23    |
| Obesity                                            | 34 (53.1)              | 82 (58.5)         | 26 (81.3)          | 11 (91.7)                 | 0.005   |
| Tobacco use                                        | 2 (3.1)                | 17 (12.1)         | 6 (18.8)           | 2 (16.7)                  | 0.04    |
| Chronic Hypertension                               | 0                      | 4 (2.9)           | 2 (6.3)            | 1 (8.3)                   | 0.10    |
| Gestational age at SARS-CoV-2 diagnosis Mean (std) | 35.0 (8.5)             | 26.8 (9.7)        | 26.9 (9.2)         | 28.4 (7.1)                | <0.001  |
| Infant                                             | Asymptomatic<br>N = 65 | Mild<br>N = 142   | Moderate<br>N = 32 | Severe/Critical<br>N = 13 |         |
| Sex (female)                                       | 34 (52.3)              | 71 (50.0)         | 18 (56.3)          | 9 (69.2)                  | 0.59    |
| Cord blood available                               | 64                     | 138               | 19                 | 10                        |         |
| Latency time (weeks) med (IQR)                     | N/A                    | 9.36 (3.57-17.64) | 10.07(3.86-18.29)  | 8.57 (1.86-14.79)         |         |

^Severity according to NIH guidelines<sup>31</sup>

**Supplementary Table 2: IgG and transfer ratio comparisons based on severity and latency**

|                | <= 90 days       |                   |                     |         | > 90 days        |                   |                     |         |
|----------------|------------------|-------------------|---------------------|---------|------------------|-------------------|---------------------|---------|
|                | Mild             | Moderate          | Severe/Critical     | p-value | Mild             | Moderate          | Severe/Critical     | p-value |
| Maternal IgG   | 1.92 (0.76-6.33) | 7.80 (0.86-14.10) | 20.40 (11.44-31.01) | 0.085   | 0.98 (0.40-2.15) | 1.84 (1.48-8.70)  | 8.28 (8.07-26.26)   | <0.001  |
| Transfer Ratio | 0.99 (0.35-1.50) | 0.89 (0.70-1.12)  | 0.78 (0.75-0.96)    | 0.78    | 1.35 (1.04-1.70) | 1.39 (1.29-1.73)  | 1.70 (1.07-2.27)    | 0.67    |
| Infant IgG     | 1.64 (0.46-5.73) | 6.48 (0.90-13.89) | 11.48 (0.19-16.18)  | 0.21    | 1.26 (0.65-3.43) | 3.48 (2.20-30.30) | 25.48 (18.55-34.66) | 0.0038  |

Kruskal-Wallis ANOVA

**Supplementary Table 3: IgG and transfer ratio comparisons based on fetal sex**

| Med (IQR)      | All                 |                   |         | SARS-CoV-2 Infection |                  |         | COVID-19 Vaccination |                    |         |
|----------------|---------------------|-------------------|---------|----------------------|------------------|---------|----------------------|--------------------|---------|
|                | Female              | Male              | p-value | Female               | Male             | p-value | Female               | Male               | p-value |
| Maternal IgG   | 3.06 (0.99 - 12.79) | 3.67 (0.54-14.66) | 0.87    | 1.79 (0.62-6.03)     | 1.21 (0.39-8.12) | 0.49    | 14.11 (5.83-31.86)   | 17.97 (9.40-26.47) | 0.98    |
| Infant IgG     | 2.63 (0.54-15-26)   | 2.24 (0.46-11.32) | 0.41    | 1.73 (0.37-6.63)     | 1.10 (0.41-4.67) | 0.27    | 22.05 (7.56-36.77)   | 16.22 (7.76-22.47) | 0.33    |
| Transfer Ratio | 1.26 (0.68-1.75)    | 1.00 (0.49-1.56)  | 0.14    | 1.18 (0.65-1.67)     | 1.00 (0.45-1.42) | 0.18    | 1.42 (0.94-2.16)     | 0.92 (0.51-2.06)   | 0.41    |

Wilcoxon rank sum
